# Supplementary material for: Yeast display biopanning identifies human antibodies targeting glioblastoma stem-like cells
Source: PubMed Central journal article supplement (PMC5696472; doi:10.1038/s41598-017-16066-1), 2017-11-20
Supplement: 41598_2017_16066_MOESM1_ESM.pdf [file 41598_2017_16066_MOESM1_ESM.pdf]

## **Yeast display biopanning identifies human antibodies targeting**

### **glioblastoma stem-like cells**

Michael Zorniak<sup>1,2</sup>, Paul A. Clark<sup>2</sup>, Benjamin J. Umlauf<sup>3</sup>, Yongku Cho<sup>3</sup>, Eric V. Shusta\*<sup>3,4</sup>, & John S. Kuo\*<sup>1,2,4</sup>

<sup>1</sup>Neuroscience Training Program, <sup>2</sup>Department of Neurological Surgery, <sup>3</sup>Department of Chemical and Biological Engineering, <sup>4</sup>Carbone Cancer Center, University of Wisconsin School of Medicine and Public Health, Madison, WI, 53792-8660, USA. Correspondence and requests for materials should be addressed to E.V.S. (eshusta@wisc.edu) and J.S.K. (email: kuo@neurosurgery.wisc.edu).

### **Supplementary information**

**Supplementary Figure 1. Descriptive statistics of biopanning screening.** (a) Positive screening statistics against 22 GSC. (b) Negative screening statistics against hNSC, NHA, and 22T co-culture. (c) Re-positive screening statistics against 22 GSC. (d) Pie charts show increase in antibody clone diversity and selectivity after negative screening. scFv-9.1 is non-specific, and VH-9.7 is GSC-selective. Notably, by round 9 nearly half of the discovered clones are non-specific scFv-9.1. Negative screening rounds S.7, S.8, and S.9 show a steady rise in non-specific scFv-9.1 from 4.88% to 24.4 %, but still less than 45.8% observed in round 9 alone. (e) Antibody-dependent enrichment was determined by incubating yeast binders from round nine with GSC in the presence or absence of antibody expression-inducing media (galactose) or non-inducing media (glucose). Scale bar, 100  $\mu$ m.

**Supplementary Figure 2. Unique clones discovered by plasmid isolation, PCR and BstNI restriction enzyme digest revealing different patterns on DNA gel electrophoresis.** 62 unique scFv or VH clones were isolated out of 598 total yeast screened. Clones were isolated from round 6, 9, S.6, S.7, S.8, S.9, and RS.6. MW = Molecular Weight.

**Supplementary Figure 3. Unique yeast scFv and VH screened for GSC-selectivity.** (a) Examples of qualitative scoring of yeast scFv binding with various intensity, from 0 (no observed binding) to 3 (significant yeast binding). Yeast were seeded in 96 well plates, incubated for 2 hours at 4 °C and washed according to the biopanning protocol<sup>1</sup>. Scale bar, 50  $\mu$ m. (b) Heat map of 62 yeast scFv or VH clones binding 12 different cells lines: normal human astrocytes (NHA); human neural stem cells (hNSC); 12.1, 22, 33, 44, & 99 GSC; and 22, 33, 99, U251, & U87 serum cultured tumor lines. Negative control: anti-lysozyme D1.3. Positive control: anti-neural cell adhesion molecule (NCAM) scFv-J.

**Supplementary Figure 4. Monomeric affinity (K<sub>d</sub>) of VH-9.7 on 33 GSCs.** (a) VH-9.7 is produced largely as monomer. Ni-NTA purified VH-9.7 was analyzed by size exclusion chromatography. Elution fractions were collected and analyzed via western blotting for VH-9.7 against the c-Myc epitope tag. The major VH-9.7 peak (retention time = 13.1 min) corresponded to a size of 15.3 kDa, and the expected monomeric size of VH-9.7 is ~15 kDa. Arrowheads represent the elution times for molecular size standards. 97% of the VH-9.7 detected by western blotting was monomeric. (b) Affinity titration of monomeric VH-9.7 on 33 GSCs. Monomeric VH-9.7 was titrated against 33 GSCs and binding assessed by flow cytometry. Fitting to a standard biomolecular binding equilibrium model<sup>2</sup>, these data yielded a K<sub>d</sub> of 74.30 ± 9.85 nM. The results of four independent titrations are plotted as mean ± SEM. (c) Full-length immunoblot of Figure 3a elution fractions for VH-9.7 and scFv-4-4-20. Dashed boxes indicate location of image cropping.

**Supplementary Figure 5. VH-9.7 labels human cells in formalin fixed orthotopic mouse 44 GSC-derived orthotopic tumor xenografts.** (a) Dissociated brains from mouse xenografts were labeled with Ms-anti-c-Myc:AlexaFluor 647 (66 nM) and Gt-anti-Ms-IgG:AlexaFluor 488 (1:100) to serve as a negative control. (b) Addition of Ms-anti-human nuclei (HuNu) (1:100) and VH-9.7 (125 nM) to three 44 GSC-derived xenografts indicating human-specific labeling of VH-9.7 in quadrant 2 (Q2).

**Supplementary Figure 6.** Purified near-infrared VH-9.7 localizes to human 22 GSC orthotopic xenografts. Representative near-infrared fluorescent images captured from ex vivo coronal brain sections of orthotopic 22 GSC-derived tumors in mice. Tumor area was identified using H&E counterstaining. 22 GSC-derived xenografts have low expression of EGFR and the anti-EGFR antibody cetuximab was used as a control.

## **VH-9.7 IgBLAST (NCBI)**

IGHV1-46\*01, IGHD3-10\*01, & IGHJ4\*02

### **Plasmid Sequences**

Plasmids are available upon request as subject to a standard material transfer agreement.

### **Supplementary references**

- 1 Wang, X. X., Cho, Y. K. & Shusta, E. V. Mining a yeast library for brain endothelial cell-binding antibodies. *Nature methods* **4**, 143-145, doi:10.1038/nmeth993 (2007).
- 2 Tillotson, B. J., Cho, Y. K. & Shusta, E. V. Cells and cell lysates: a direct approach for engineering antibodies against membrane proteins using yeast surface display. *Methods* **60**, 27-37, doi:10.1016/j.ymeth.2012.03.010 (2013).

# Supplementary Figure 1

**a** Positive Screening Rounds Against 22 GSC

|                                        | 1               | 2                  | 3                  | 4                  | 5               | 6                  | 7                 | 8                  | 9                  |
|----------------------------------------|-----------------|--------------------|--------------------|--------------------|-----------------|--------------------|-------------------|--------------------|--------------------|
| Total no. yeast applied                | $5 \times 10^9$ | $2 \times 10^8$    | $5 \times 10^7$    | $5 \times 10^7$    | $5 \times 10^7$ | $5 \times 10^7$    | $5 \times 10^7$   | $5 \times 10^7$    | $5 \times 10^7$    |
| Yeast density (yeast/cm <sup>2</sup> ) | $4 \times 10^7$ | $4 \times 10^6$    | $2 \times 10^6$    | $2 \times 10^6$    | $2 \times 10^6$ | $2 \times 10^6$    | $2 \times 10^6$   | $2 \times 10^6$    | $2 \times 10^6$    |
| Surface area (cm <sup>2</sup> )        | 126             | 50.2               | 25.1               | 25.1               | 25.1            | 25.1               | 25.1              | 25.1               | 25.1               |
| No. recovered yeast                    | ND              | $2.58 \times 10^6$ | $4.28 \times 10^5$ | $9.05 \times 10^5$ | ND              | $2.58 \times 10^6$ | $7.8 \times 10^6$ | $5.86 \times 10^6$ | $6.26 \times 10^6$ |
| Recovery percentage                    | ND              | 1.3                | 0.86               | 1.8                | ND              | 5.2                | 16                | 12                 | 13                 |
| No. different binders/analyzed yeast   | ND              | ND                 | ND                 | ND                 | ND              | 26/110             | ND                | ND                 | 15/201             |

**b** Negative Screening Rounds Against Co-Culture

|                                        | S.6                | S.7                | S.8                | S.9                |
|----------------------------------------|--------------------|--------------------|--------------------|--------------------|
| Total no. yeast applied                | $5 \times 10^6$    | $5 \times 10^6$    | $5 \times 10^6$    | $5 \times 10^6$    |
| Yeast density (yeast/cm <sup>2</sup> ) | $2 \times 10^5$    | $2 \times 10^5$    | $2 \times 10^5$    | $2 \times 10^5$    |
| Surface area (cm <sup>2</sup> )        | 25.1               | 25.1               | 25.1               | 25.1               |
| No. depleted yeast                     | $4.77 \times 10^6$ | $4.62 \times 10^6$ | $4.70 \times 10^6$ | $4.66 \times 10^6$ |
| Depletion percentage                   | 95                 | 93                 | 94                 | 93                 |
| No. different binders/analyzed yeast   | 34/81              | 19/41              | 12/41              | 11/41              |

**c** Re-Positive Screening Against 22 GSC

|                                        | RS.6               |
|----------------------------------------|--------------------|
| Total no. yeast applied                | $5 \times 10^7$    |
| Yeast density (yeast/cm <sup>2</sup> ) | $2 \times 10^6$    |
| Surface area (cm <sup>2</sup> )        | 25.1               |
| No. recovered yeast                    | $2.62 \times 10^7$ |
| Recovery percentage                    | 52                 |
| No. different binders/analyzed yeast   | 27/83              |

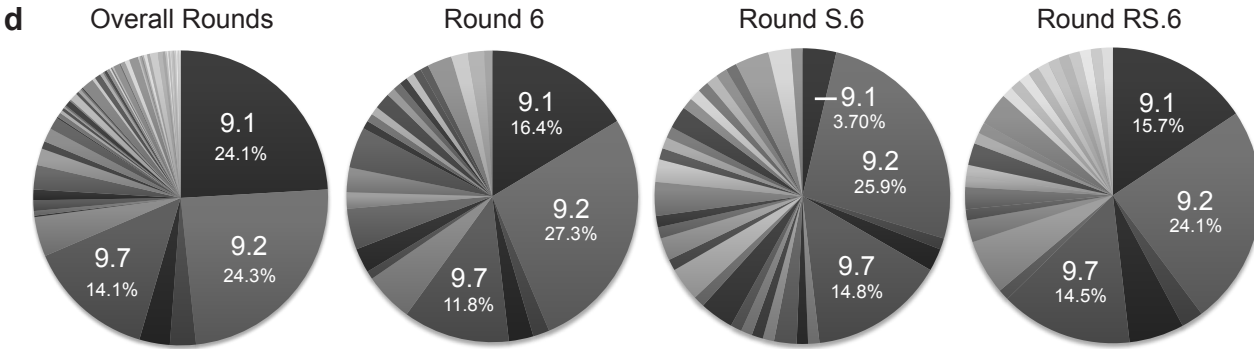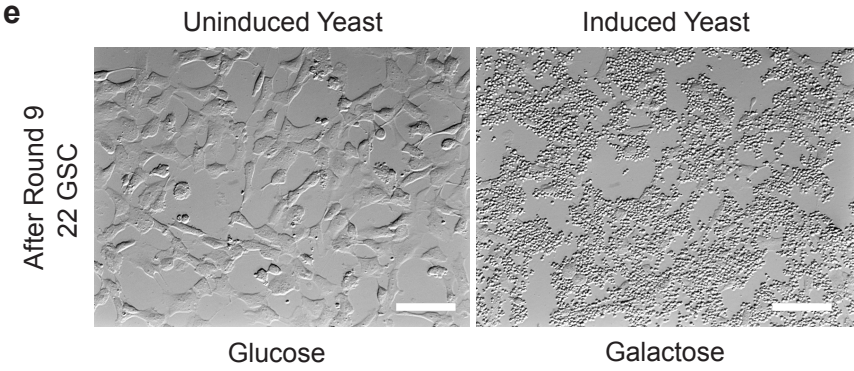

Supplementary Figure 2

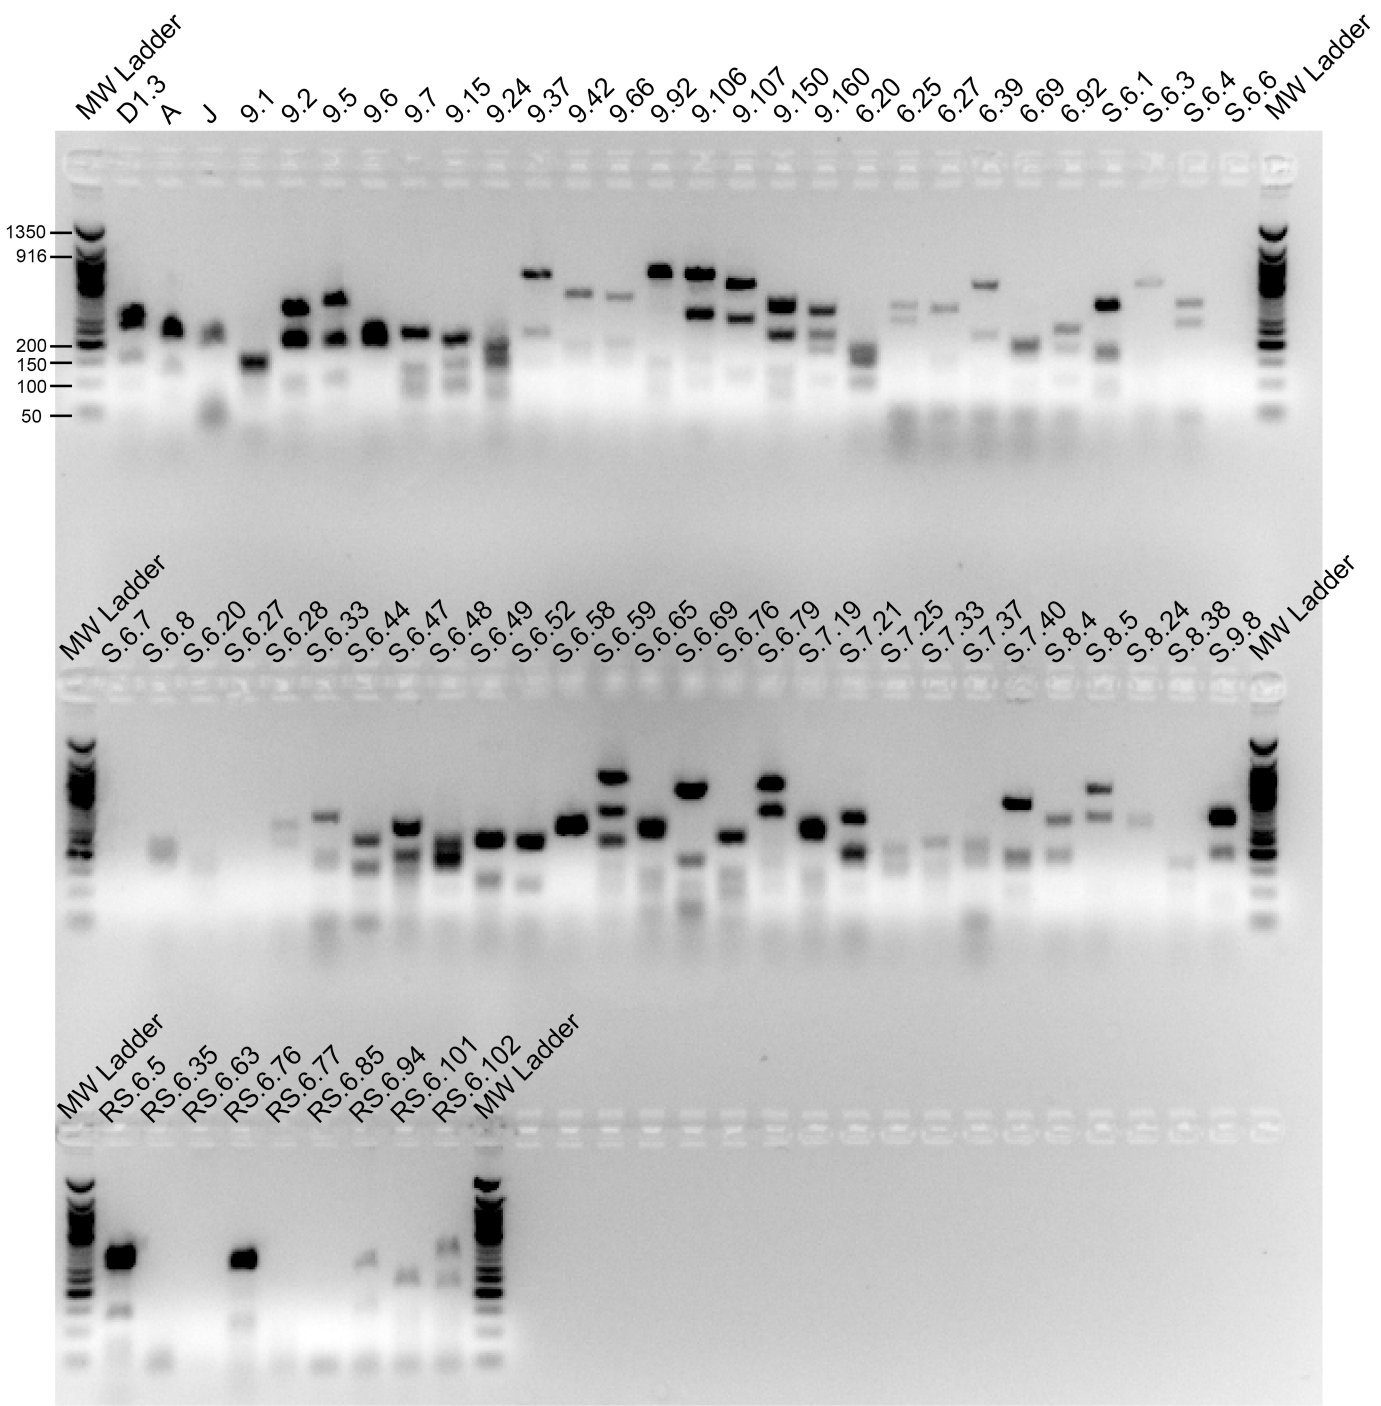

**Supplementary Figure 3**

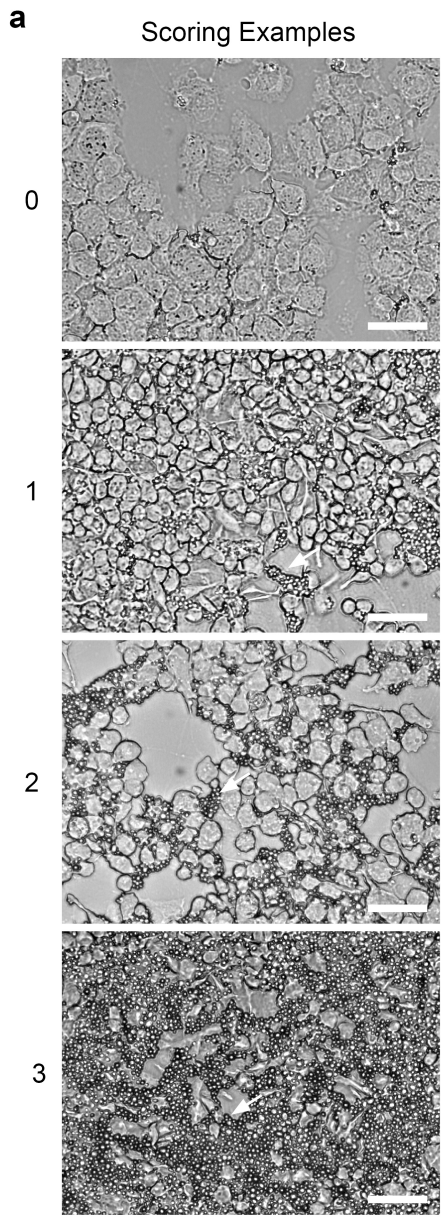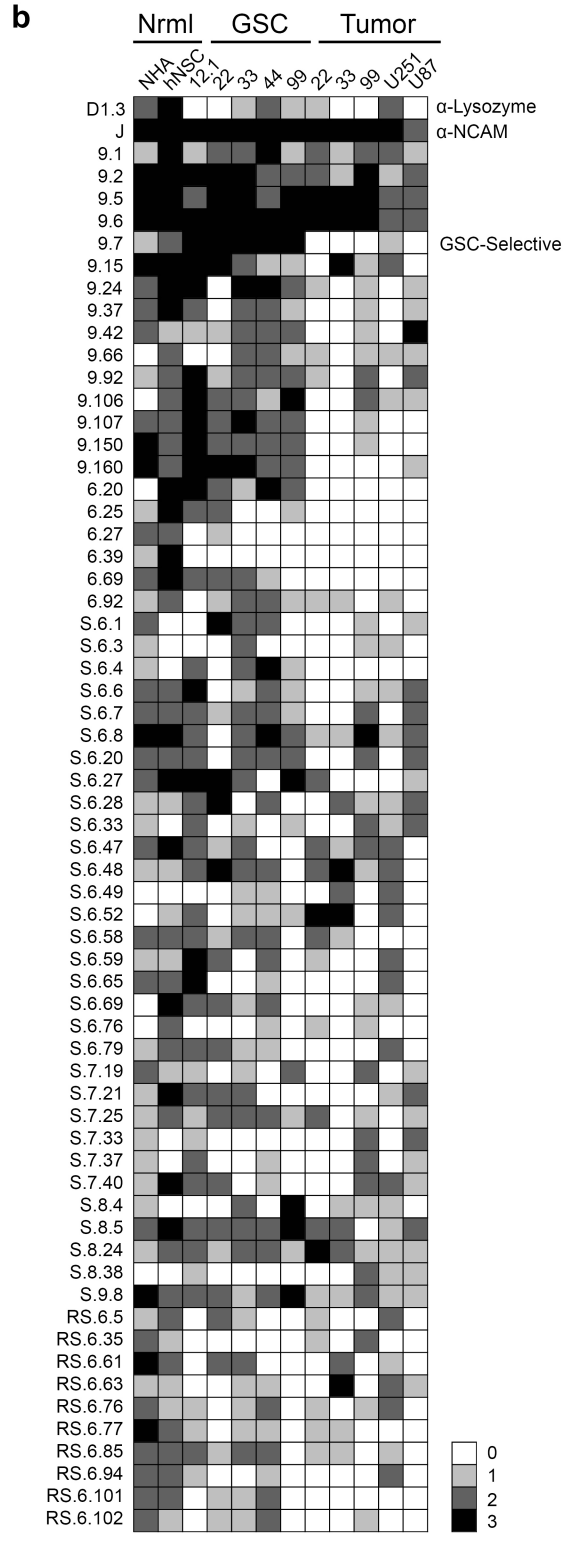

# Supplementary Figure 4

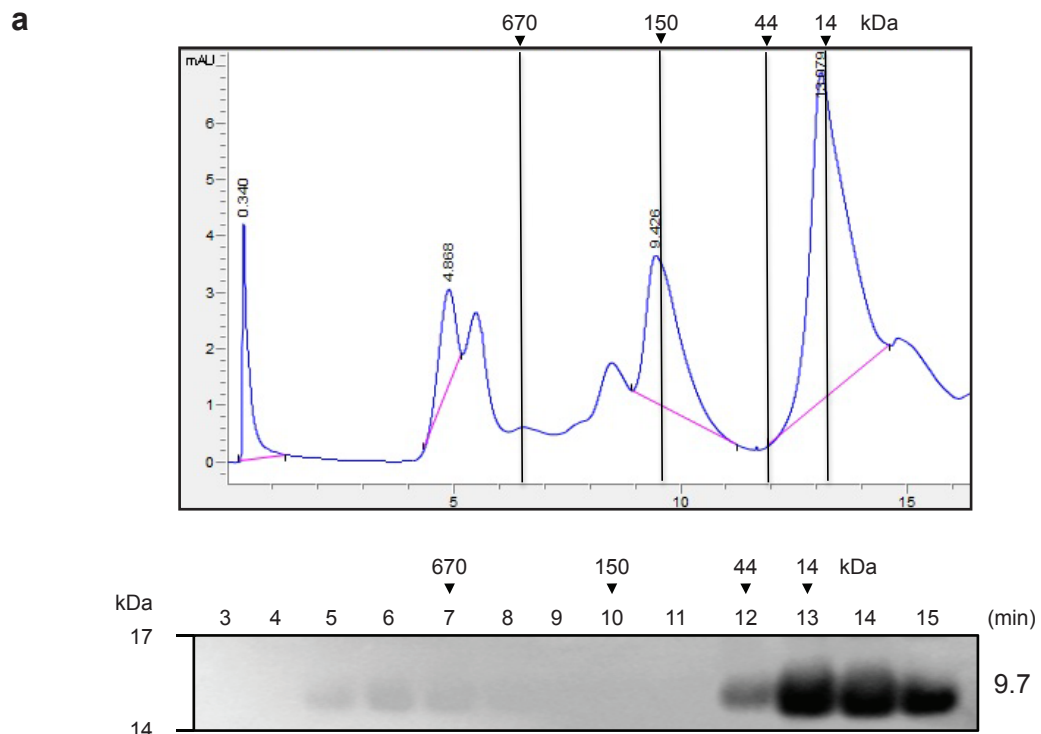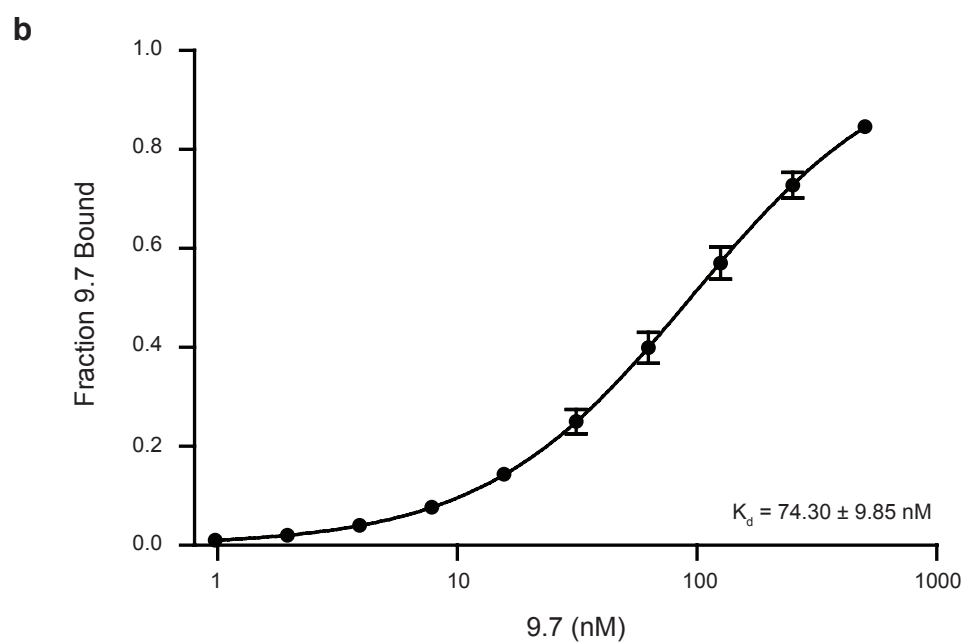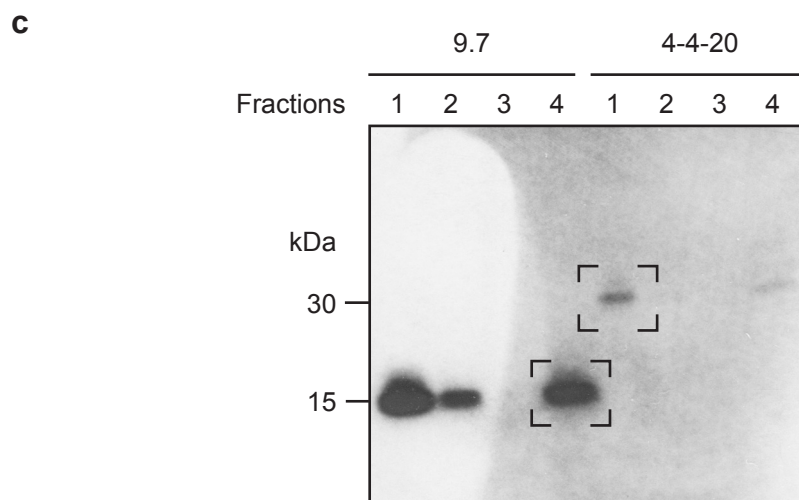



Supplementary Figure 5

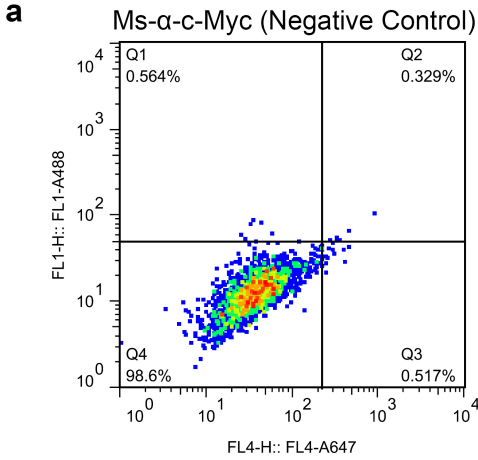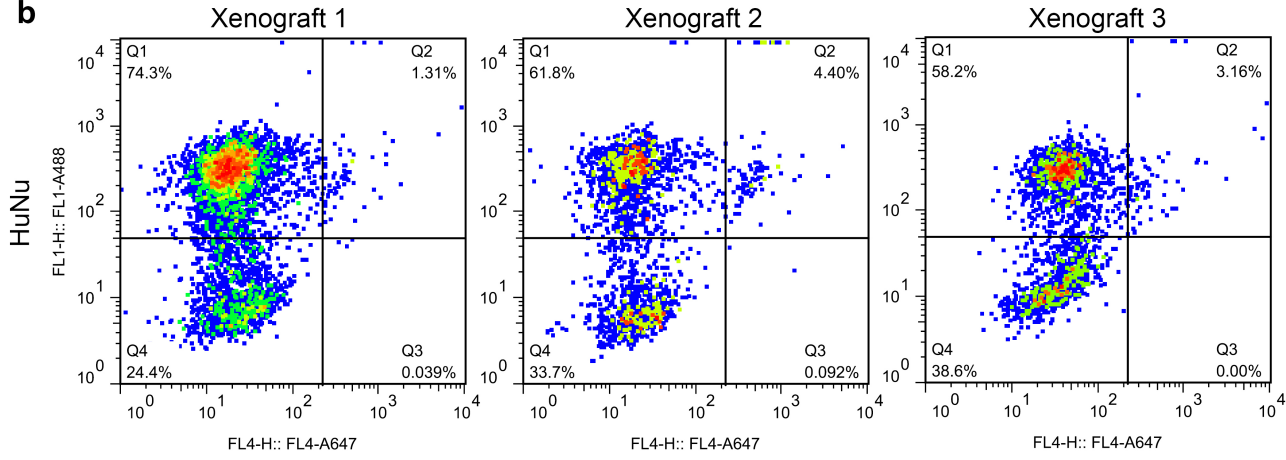

Supplementary Figure 6

22 GSC Xenografts

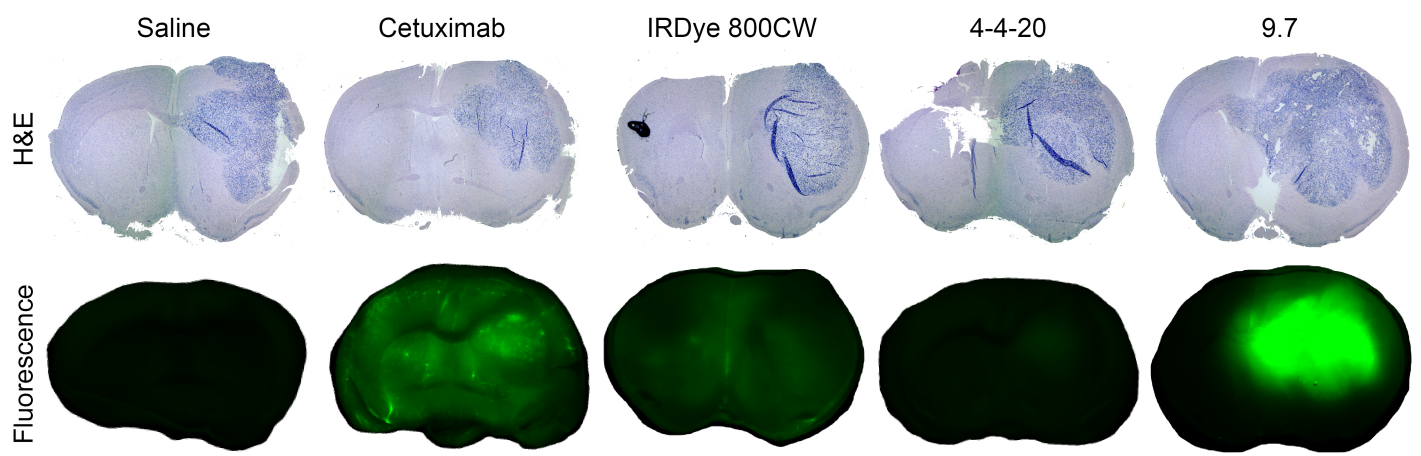

**Supplementary Table 1. Yeast scFv clone discovery counts.**

| #              | Clone ID | Round 6 | Round 9 | Round S.6 | Round S.7 | Round S.8 | Round S.9 | Round RS.6 | Total |
|----------------|----------|---------|---------|-----------|-----------|-----------|-----------|------------|-------|
| 1              | 9.1      | 18      | 92      | 3         | 2         | 6         | 10        | 13         | 144   |
| 2              | 9.2      | 30      | 42      | 21        | 12        | 11        | 9         | 20         | 145   |
| 3              | 9.5      | 2       | 10      | 1         | 0         | 0         | 2         | 2          | 17    |
| 4              | 9.6      | 3       | 4       | 2         | 1         | 3         | 2         | 5          | 20    |
| 5              | 9.7      | 13      | 23      | 12        | 4         | 11        | 9         | 12         | 84    |
| 6              | 9.15     | 6       | 13      | 1         | 0         | 2         | 4         | 0          | 26    |
| 7              | 9.24     | 0       | 1       | 0         | 0         | 0         | 0         | 0          | 1     |
| 8              | 9.37     | 0       | 3       | 0         | 0         | 0         | 0         | 0          | 3     |
| 9              | 9.42     | 1       | 3       | 0         | 2         | 0         | 1         | 0          | 7     |
| 10             | 9.66     | 3       | 1       | 1         | 1         | 0         | 1         | 0          | 7     |
| 11             | 9.92     | 5       | 4       | 2         | 1         | 2         | 1         | 1          | 16    |
| 12             | 9.106    | 2       | 2       | 1         | 1         | 0         | 0         | 5          | 11    |
| 13             | 9.107    | 0       | 1       | 1         | 2         | 1         | 0         | 0          | 5     |
| 14             | 9.150    | 3       | 1       | 1         | 2         | 0         | 0         | 2          | 9     |
| 15             | 9.160    | 5       | 1       | 1         | 0         | 0         | 0         | 1          | 8     |
| 16             | 6.20     | 1       | 0       | 0         | 0         | 0         | 0         | 0          | 1     |
| 17             | 6.25     | 1       | 0       | 0         | 0         | 0         | 0         | 2          | 3     |
| 18             | 6.27     | 1       | 0       | 0         | 0         | 0         | 0         | 1          | 2     |
| 19             | 6.39     | 2       | 0       | 0         | 0         | 0         | 0         | 0          | 2     |
| 20             | 6.69     | 1       | 0       | 0         | 0         | 0         | 0         | 0          | 1     |
| 21             | 6.92     | 1       | 0       | 0         | 0         | 0         | 0         | 0          | 1     |
| 22             | S.6.1    | 1       | 0       | 3         | 0         | 0         | 0         | 0          | 4     |
| 23             | S.6.3    | 0       | 0       | 1         | 0         | 0         | 0         | 0          | 1     |
| 24             | S.6.4    | 1       | 0       | 3         | 0         | 0         | 0         | 1          | 5     |
| 25             | S.6.6    | 1       | 0       | 1         | 0         | 0         | 0         | 0          | 2     |
| 26             | S.6.7    | 0       | 0       | 2         | 0         | 0         | 0         | 0          | 2     |
| 27             | S.6.8    | 0       | 0       | 1         | 0         | 0         | 0         | 0          | 1     |
| 28             | S.6.20   | 0       | 0       | 1         | 0         | 0         | 0         | 0          | 1     |
| 29             | S.6.27   | 0       | 0       | 3         | 5         | 0         | 0         | 0          | 8     |
| 30             | S.6.28   | 0       | 0       | 2         | 0         | 0         | 0         | 0          | 2     |
| 31             | S.6.33   | 1       | 0       | 1         | 0         | 0         | 0         | 2          | 4     |
| 32             | S.6.47   | 0       | 0       | 1         | 0         | 0         | 0         | 1          | 2     |
| 33             | S.6.48   | 0       | 0       | 1         | 0         | 0         | 0         | 0          | 1     |
| 34             | S.6.49   | 0       | 0       | 2         | 0         | 0         | 0         | 0          | 2     |
| 35             | S.6.52   | 0       | 0       | 1         | 0         | 0         | 0         | 1          | 2     |
| 36             | S.6.58   | 0       | 0       | 1         | 0         | 0         | 0         | 0          | 1     |
| 37             | S.6.59   | 0       | 0       | 1         | 0         | 0         | 0         | 0          | 1     |
| 38             | S.6.65   | 0       | 0       | 1         | 0         | 0         | 0         | 0          | 1     |
| 39             | S.6.69   | 0       | 0       | 1         | 0         | 0         | 0         | 3          | 4     |
| 40             | S.6.76   | 0       | 0       | 1         | 0         | 0         | 0         | 0          | 1     |
| 41             | S.6.79   | 0       | 0       | 3         | 0         | 0         | 0         | 0          | 3     |
| 42             | S.7.19   | 0       | 0       | 2         | 1         | 0         | 0         | 0          | 3     |
| 43             | S.7.21   | 3       | 0       | 1         | 1         | 0         | 0         | 0          | 6     |
| 44             | S.7.25   | 0       | 0       | 0         | 1         | 0         | 0         | 0          | 1     |
| 45             | S.7.33   | 0       | 0       | 0         | 1         | 0         | 0         | 0          | 1     |
| 46             | S.7.37   | 0       | 0       | 0         | 1         | 0         | 0         | 0          | 1     |
| 47             | S.7.40   | 0       | 0       | 0         | 1         | 0         | 0         | 0          | 1     |
| 48             | S.8.4    | 0       | 0       | 0         | 0         | 1         | 0         | 1          | 2     |
| 49             | S.8.5    | 0       | 0       | 0         | 1         | 1         | 0         | 0          | 2     |
| 50             | S.8.24   | 2       | 0       | 0         | 1         | 1         | 1         | 0          | 5     |
| 51             | S.8.38   | 2       | 0       | 0         | 0         | 1         | 0         | 0          | 3     |
| 52             | S.9.8    | 1       | 0       | 0         | 0         | 0         | 1         | 0          | 2     |
| 53             | RS.6.5   | 0       | 0       | 0         | 0         | 0         | 0         | 1          | 1     |
| 54             | RS.6.35  | 0       | 0       | 0         | 0         | 0         | 0         | 1          | 1     |
| 55             | RS.6.61  | 0       | 0       | 0         | 0         | 0         | 0         | 1          | 1     |
| 56             | RS.6.63  | 0       | 0       | 0         | 0         | 0         | 0         | 1          | 1     |
| 57             | RS.6.76  | 0       | 0       | 0         | 0         | 0         | 0         | 1          | 1     |
| 58             | RS.6.77  | 0       | 0       | 0         | 0         | 0         | 0         | 1          | 1     |
| 59             | RS.6.85  | 0       | 0       | 0         | 0         | 0         | 0         | 1          | 1     |
| 60             | RS.6.94  | 0       | 0       | 0         | 0         | 0         | 0         | 1          | 1     |
| 61             | RS.6.101 | 0       | 0       | 0         | 0         | 0         | 0         | 1          | 1     |
| 62             | RS.6.102 | 0       | 0       | 0         | 0         | 0         | 0         | 1          | 1     |
| Unique Clones  |          | 26      | 15      | 34        | 19        | 12        | 11        | 27         | 62    |
| Total Analyzed |          | 110     | 201     | 81        | 41        | 41        | 41        | 83         | 598   |
